# Supplementary material for: Effects of Vitamin B2 Supplementation in Broilers Microbiota and Metabolome
Source: MDPI journal article supplement (doi:10.3390/microorganisms8081134), 2020-07-27
Supplement: s1 [file s1]

## **Effects of vitamin B2 supplementation in broilers microbiota and metabolome**

Elena Biagi\*, Carlo Mengucci, Monica Barone, Gianfranco Picone, Alex Lucchi, Pietro

Celi, Gilberto Litta, Marco Candela, Gerardo Manfreda, Patrizia Brigidi, Francesco

Capozzi, Alessandra De Cesare

[\\*elena.biagi@unibo.it](mailto:*elena.biagi@unibo.it)

## **SUPPLEMENTARY MATERIALS**

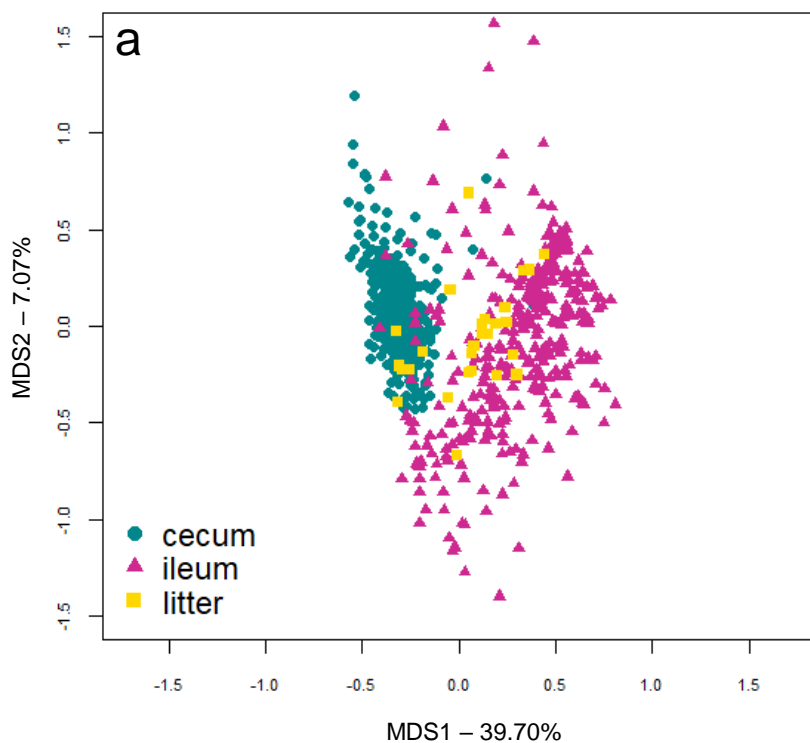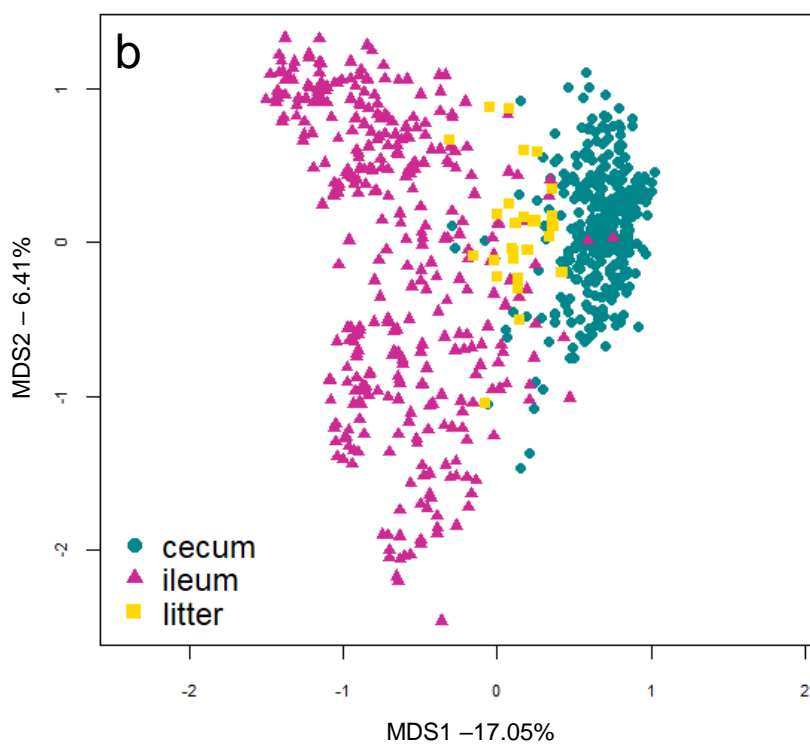

**Supplementary Fig. S1: Principal Coordinates Analyses (PCoA) based on Weighted (a) and Unweighted (b) UniFrac distances of caecal (seagreen), ileal (purple) and litter (gold) microbiota profiles.** Samples are depicted as dots for caeca, triangles for ileum, and squares for litter, according to the color legend. First and second coordination axes are reported in each plot; percentages of variation in the datasets explained by each axes are reported.

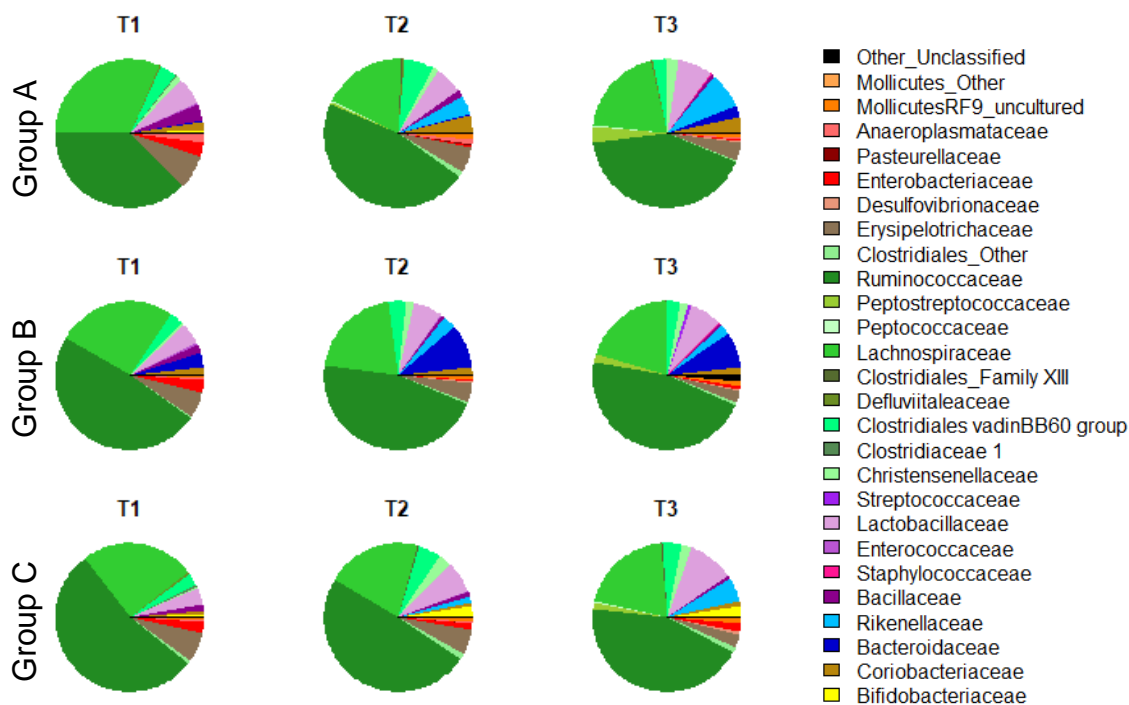

**Supplementary Figure S2: Family level microbiota profiles of broiler caeca ecosystem.** Average phylogenetic profiles of the caecal microbiome of broilers in groups A, B and C (top-down), for each available time point (T1, T2, T3; from left to right) are provided as pie charts at family level; bacterial taxa were filtered for graphical representation as >0.5% in at least 1% of all the available samples.

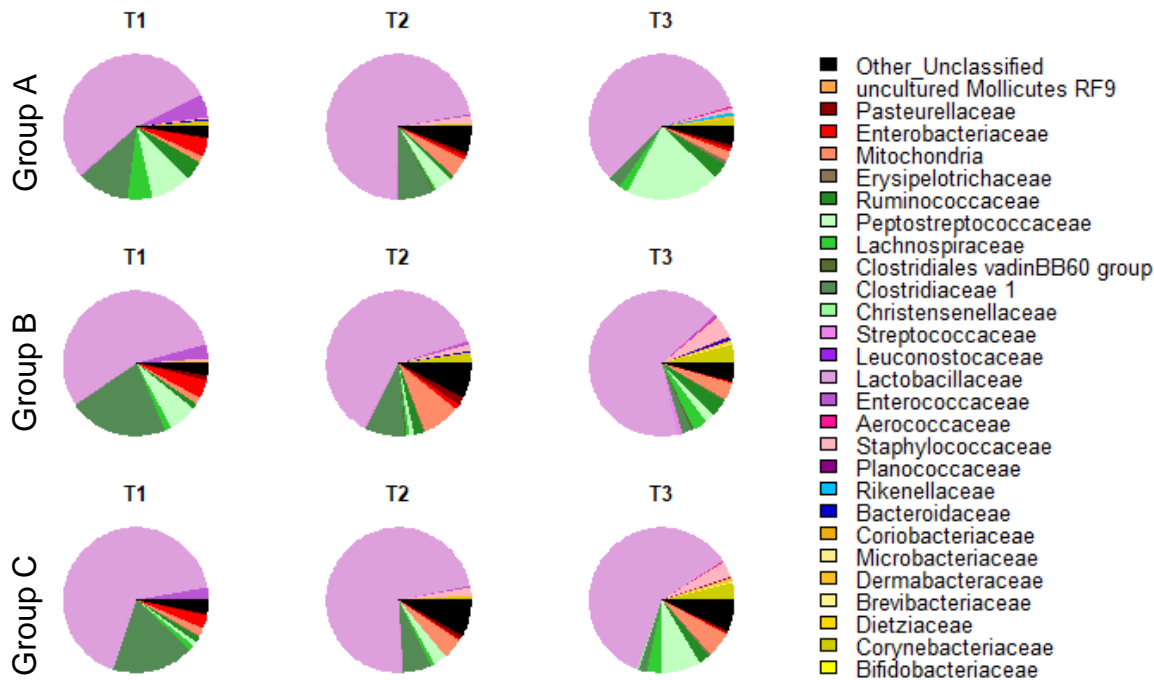

**Supplementary Figure S3: Family level microbiota profiles of broiler ileum ecosystem.** Average phylogenetic profiles of the ileal microbiome of broilers in groups A, B and C (top-down), for each available time point (T1, T2, T3; from left to right) are provided as pie charts at family level; bacterial taxa were filtered for graphical representation as >0.5% in at least 1% of all the available samples.

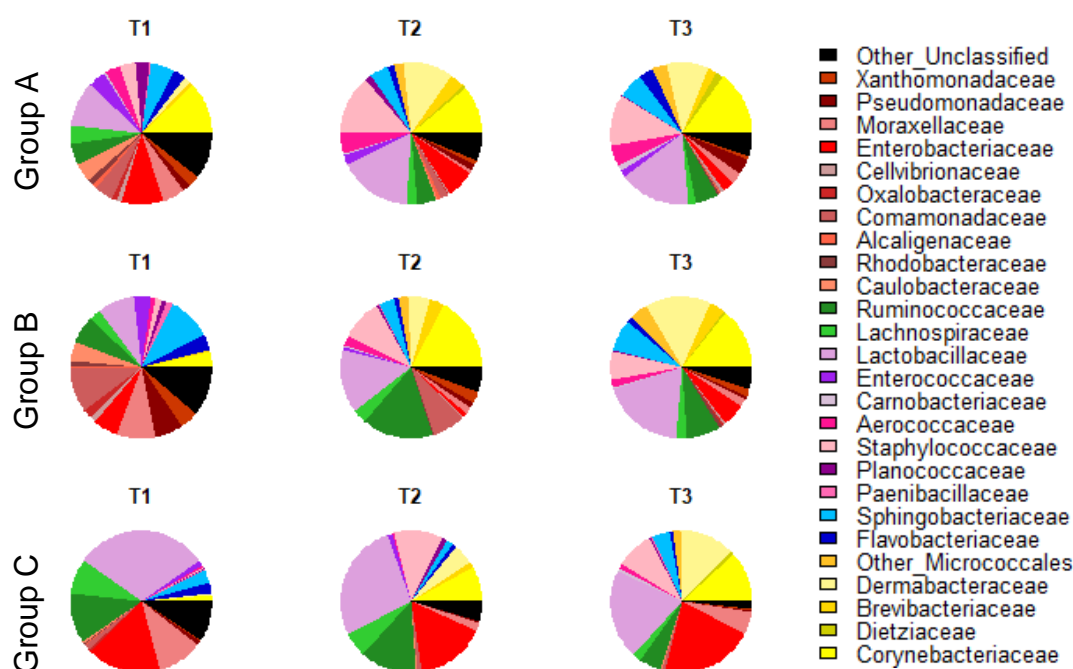

**Supplementary Figure S4: Family level microbiota profiles of litter ecosystem in broilers group A, B and C.** Average phylogenetic profiles of the litter microbiome in broilers groups A, B and C (top-down), for each available time point (T1, T2, T3; from left to right) are provided as pie charts at family level; bacterial taxa were filtered for graphical representation as >1% in at least 3 out of 27 samples.

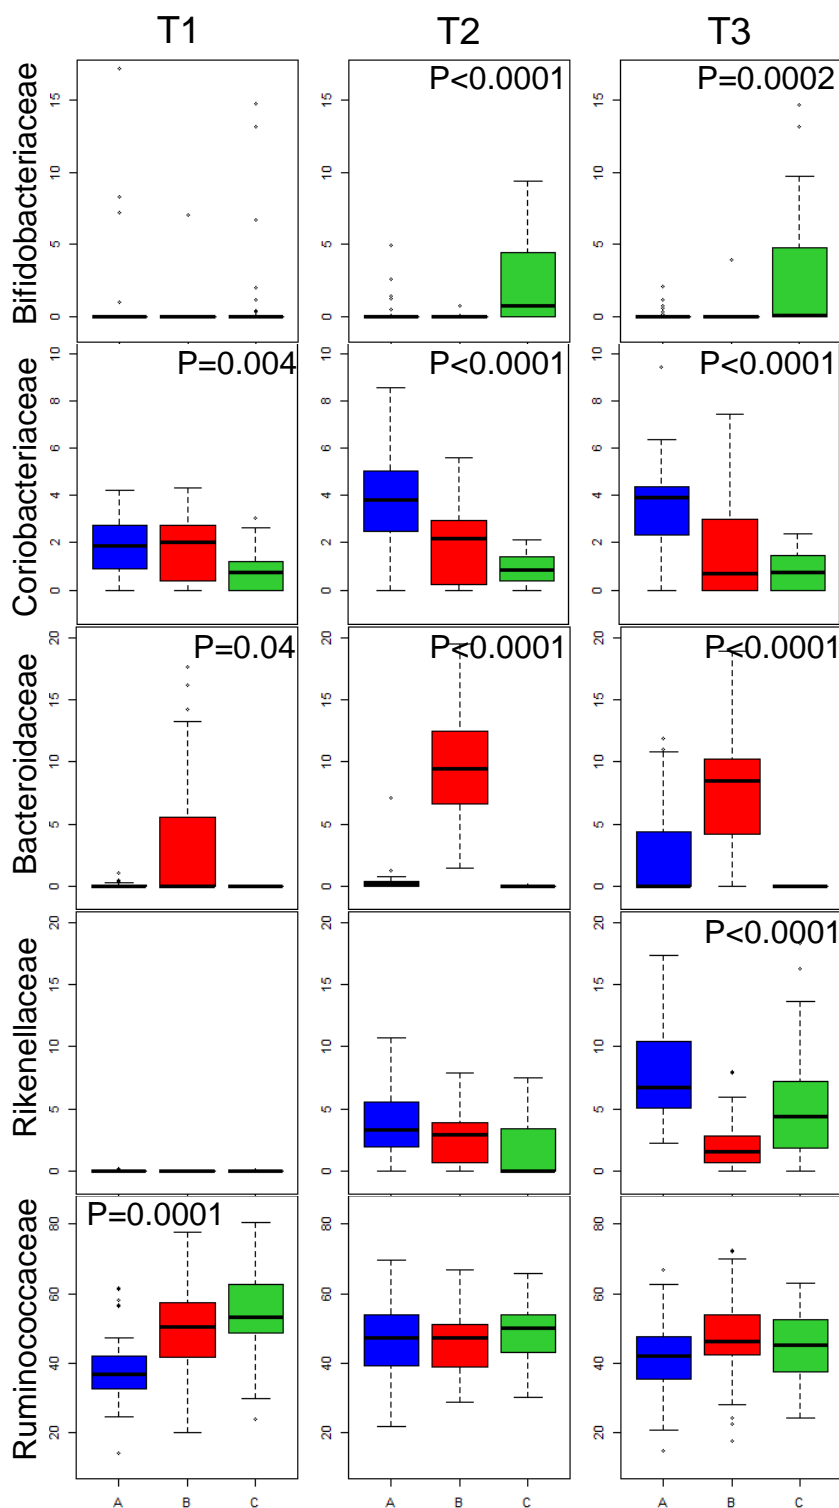

**Supplementary Figure S5: Relative abundance distributions of bacterial families in the caecal microbiota of broilers.** Box and whiskers distributions of relative abundances (%) in all samples, at the three time points (from left to right) are depicted for those families showing significant differences between the three group (A, blue; B, red; C, green) in at least one timepoint. Bejamini-Hochberg corrected P values obtained from Kruskal-Wallis test are reported when statistical significance was reached ( $P < 0.05$ ).

**Supplementary table S1.** Feed composition (%) in relation to different feeding phases (starter, from 0 to 15 days; grower, from 16 to 28 days; finisher, from 29 to 42 days).

| INGREDIENTS                 | STARTER | GROWER | FINISHER |
|-----------------------------|---------|--------|----------|
| Corn                        | 42.20   | 37.50  | 37.50    |
| Wheat                       | 10.18   | 20.38  | 25.47    |
| Soybean meal                | 18.56   | 18.57  | 10.13    |
| Fullfat soybean             | 12.22   | 15.28  | 17.32    |
| Soybean concentrate high cp | 5.09    | 0.00   | 0.00     |
| Sunflower                   | 2.04    | 2.04   | 3.05     |
| Gluten corn                 | 3.06    | 0.00   | 0.00     |
| Vegetable oil               | 3.18    | 3.38   | 4.27     |
| Dicalcium phosphate         | 1.24    | 0.88   | 0.57     |
| Calcium carbonate           | 0.64    | 0.50   | 0.43     |
| Salt                        | 0.26    | 0.24   | 0.16     |
| Sodium bicarbonate          | 0.10    | 0.10   | 0.21     |
| Choline chloride            | 0.10    | 0.10   | 0.05     |
| Lisine sulphate             | 0.54    | 0.44   | 0.41     |
| DL methionine               | 0.39    | 0.39   | 0.29     |
| Threonine                   | 0.14    | 0.14   | 0.08     |
| Xylanase 0.05%              | 0.06    | 0.06   | 0.06     |
| Total                       | 100.00  | 100.00 | 100.00   |

**Supplementary Table S2.** Vitamin B2 target and analyzed content in feed for each group, (mg/kg of feed and % vs target), in the different feeding phase diets.

|              | GROUP A     | GROUP B      | GROUP C       |
|--------------|-------------|--------------|---------------|
| TARGET LEVEL | 5           | 50           | 100           |
| ANALYZED     |             |              |               |
| STARTER      | 7.30 (146)  | 42.2 (84,4)  | 114 (114)     |
| GROWER       | 4.66 (93,2) | 47.8 (95,6)  | 112 (112)     |
| FINISHER     | 5.74 (115)  | 52.7 (105,4) | 102.8 (102,8) |
